# Supplementary material for: A kinematic synergy for terrestrial locomotion shared by mammals and birds
Source: eLife journal article supplement (doi:10.7554/elife.38190), 2018-10-30
Supplement: supp [file readme.pdf › SourceData1-Figure1/readme.pdf]

The Source Data 1-Figure 1 folder contains the following files:

mfiles

- LocomotionCloud.m
- cerchio.m
- intersezionerettadisco.m
- traiettoriaEP.m
- trovaConfiguration.m
- calcola colori.m
- trovaTheta1eTheta2.m
- hindlimbVSforelimbFORfigure1B.m
- hindlimbCamelVShindlimbFlamingoFORfigure1Bright.m

mat data

- data.mat
- Figure1Aforelimb.mat
- Figure1Ahindlimb.mat
- Figure1BlefthindlimbVSforelimbCheetah.mat
- Figure1BrighthindlimbCamelVShindlimbFlamingo.mat

To reproduce the Figure1 panel A:

1. in Matlab set as working directory the folder Source Data 1-Figure 1
2. Run LocomotionCloud.m
3. Select the limb and press the OK button

To reproduce the Figure1 panel B left

1. Run hindlimbVSforelimbFORfigure1B.m

To reproduce the Figure1 panel B right

1. Run hindlimbCamelVShindlimbFlamingoFORfigure1Bright.m
