# Supplementary material for: A kinematic synergy for terrestrial locomotion shared by mammals and birds
Source: eLife journal article supplement (doi:10.7554/elife.38190), 2018-10-30
Supplement: supp [file readme.pdf › SourceData2-Figure2/readme.pdf]

The Source Data 2-Figure 2 folder contains the following files:

mat data

Figure2ROM.mat

1. load('Figure2ROM.mat') in the Command Window

In the workspace you will find a table named ROM, with variable names: thigh, shank, foot, scapula, upper arm, lower arm, hand.
