# Supplementary material for: A kinematic synergy for terrestrial locomotion shared by mammals and birds
Source: eLife journal article supplement (doi:10.7554/elife.38190), 2018-10-30
Supplement: supp [file readme.pdf › SourceData3-Figure3/readme.pdf]

The Source Data 3-Figure 3 contains the following files:

mat data

Figure3.mat

load('Figure3.mat') load PV3 table with variables: PV3HL, PV3FLupp, PV3FLlow. See Figure 3
