# Supplementary material for: A kinematic synergy for terrestrial locomotion shared by mammals and birds
Source: eLife journal article supplement (doi:10.7554/elife.38190), 2018-10-30
Supplement: supp [file readme.pdf › SourceData3-Figure3supplement2/readme.pdf]

The Source Data 3-Figure 3 supplement 2 folder contains the following files:

mat data

Fig3suppl2forelimblow.mat

Fig3suppl2forelimbupp.mat

Fig3suppl2hindlimb.mat

In each mat file the first column contains the the label for each subject as they are labelled in Figure 3 -figure supplement 2A. The second column contains the  $PC_1$  and  $PC_2$  variables. The third column contains the push off value (corresponding to the black line for each gait loop). The last column has the value for the panelB

load('Fig3suppl2forelimblow.mat') load Fig3suppl2forelimblow Matlab cell.

load('Fig3suppl2forelimbupp.mat') load Fig3suppl2forelimbupp Matlab cell.

load('Fig3suppl2hindlimb.mat') load Fig3suppl2hindlimb Matlab cell.
