# Supplementary material for: A kinematic synergy for terrestrial locomotion shared by mammals and birds
Source: eLife journal article supplement (doi:10.7554/elife.38190), 2018-10-30
Supplement: supp [file readme.pdf › SourceData4-Figure4/readme.pdf]

The Source Data 4-Figure 4 contains the following files:

mat data

- Figure4.mat
- U3FLlow.mat
- U3FLupp.mat
- U3HL.mat

load('Figure4.mat') load PlaneOrientation table with variables alphaHL, alphaFLupp, and alphaFLlow, corresponding to the alpha as they are plotted in upper panels of Figure 4 A and B.

load('U3FLlow.mat') load UFL2 table with variables: U1, U2, U3, that corresponds to the components of the  $u_{3u}$ ,  $u_{3l}$ , and  $u_{3h}$  vectors . See Figure 3-figure supplement 1

load('U3FLupp.mat') load UFL1 table with variables: U1, U2, U3, that corresponds to the components of the  $u_{3sc}$ ,  $u_{3u}$ , and  $u_{3l}$  vectors . See Figure 3-figure supplement 1

load('U3HL.mat') load UHL table with variables: U1, U2, U3, that corresponds to the components of the  $u_{3t}$ ,  $u_{3s}$ , and  $u_{3f}$  vectors . See Figure 3-figure supplement 1
