# Supplementary material for: A kinematic synergy for terrestrial locomotion shared by mammals and birds
Source: eLife journal article supplement (doi:10.7554/elife.38190), 2018-10-30
Supplement: supp [file readme.pdf › SourceData4-Figure4supplement1/readme.pdf]

The Source Data 4-Figure 4 supplement 1 contains the following files:

mat data

Figure4suppl.mat

R file

Figure4suppl.R

txt format file

PhylogeneticTree\_completo

load('Figure4suppl.mat') load PhyloazimuthHL table with variable Phyloazimuth, that is the azimuth computed after phylogenetic correction.

The R file contains the algorithm to reproduce the Figure 4- figure supplement 1. To be run in the R environment.

PhylogeneticTree\_completo.txt contains the Taxonomic Tree to obtain Figure 4-figure supplement 1 in Newick format.
