# Supplementary material for: A kinematic synergy for terrestrial locomotion shared by mammals and birds
Source: eLife journal article supplement (doi:10.7554/elife.38190), 2018-10-30
Supplement: supp [file readme.pdf › SourceData5-Figure5/readme.pdf]

The Source Data 5-Figure 5 contains the following files:

mat data

Figure5.mat  
Figure5A.mat  
Figure5B.mat

load('Figure5A.mat') load Fig5A table with variables: FOOminusSHA and UPPminusSCA.  
load('Figure5.mat') load PlaneOrientation table with variables: alphaHL and alphaFLupp

To obtain Figure 5A hindlimb panel: x=PlaneOrientation.alphaHL, y=Fig5A.FOOminusSHA  
To obtain Figure 5A forelimb panel: x=PlaneOrientation.alphaFLupp,  
y=Fig5A.UPPminusSCA

load('Figure5B.mat') load Tminima table containing minimum values of the following  
elevation angles: thigh, shank, foot, scapula, upperarm, lowerarm, and hand. See Figure 5B
