# Supplementary material for: A kinematic synergy for terrestrial locomotion shared by mammals and birds
Source: eLife journal article supplement (doi:10.7554/elife.38190), 2018-10-30
Supplement: supp [file readme.pdf › SourceData6-Figure6/readme.pdf]

The Source Data 6-Figure 6 folder contains the following files:

mfiles

- Figure6A.m
- faigriglia.m
- PCA\_sin\_model\_figure6A.m
- Figure6C.m

mat data

- data.mat
- Figure6A.mat
- Figure6C.mat

To reproduce the Figure6 panel A:

1. in Matlab set as working directory the folder Source Data 6-Figure 6
2. Run Figure6A.m

To reproduce the Figure6 panel C:

1. in Matlab set as working directory the folder Source Data 6-Figure 6
2. Run Figure6C.m
